# Supplementary material for: Atrial fibroblast–derived macrophage migration inhibitory factor promotes atrial macrophage accumulation in postoperative atrial fibrillation
Source: JCI journal article supplement (doi:10.1172/jci.insight.190756), 2025-08-14

# Unedited gels

→ denotes band of interest

□ denotes representative blot used in figure

L denote ladder

X denotes samples that were excluded

**Full, unedited blots for Figure 1F – gel 1**

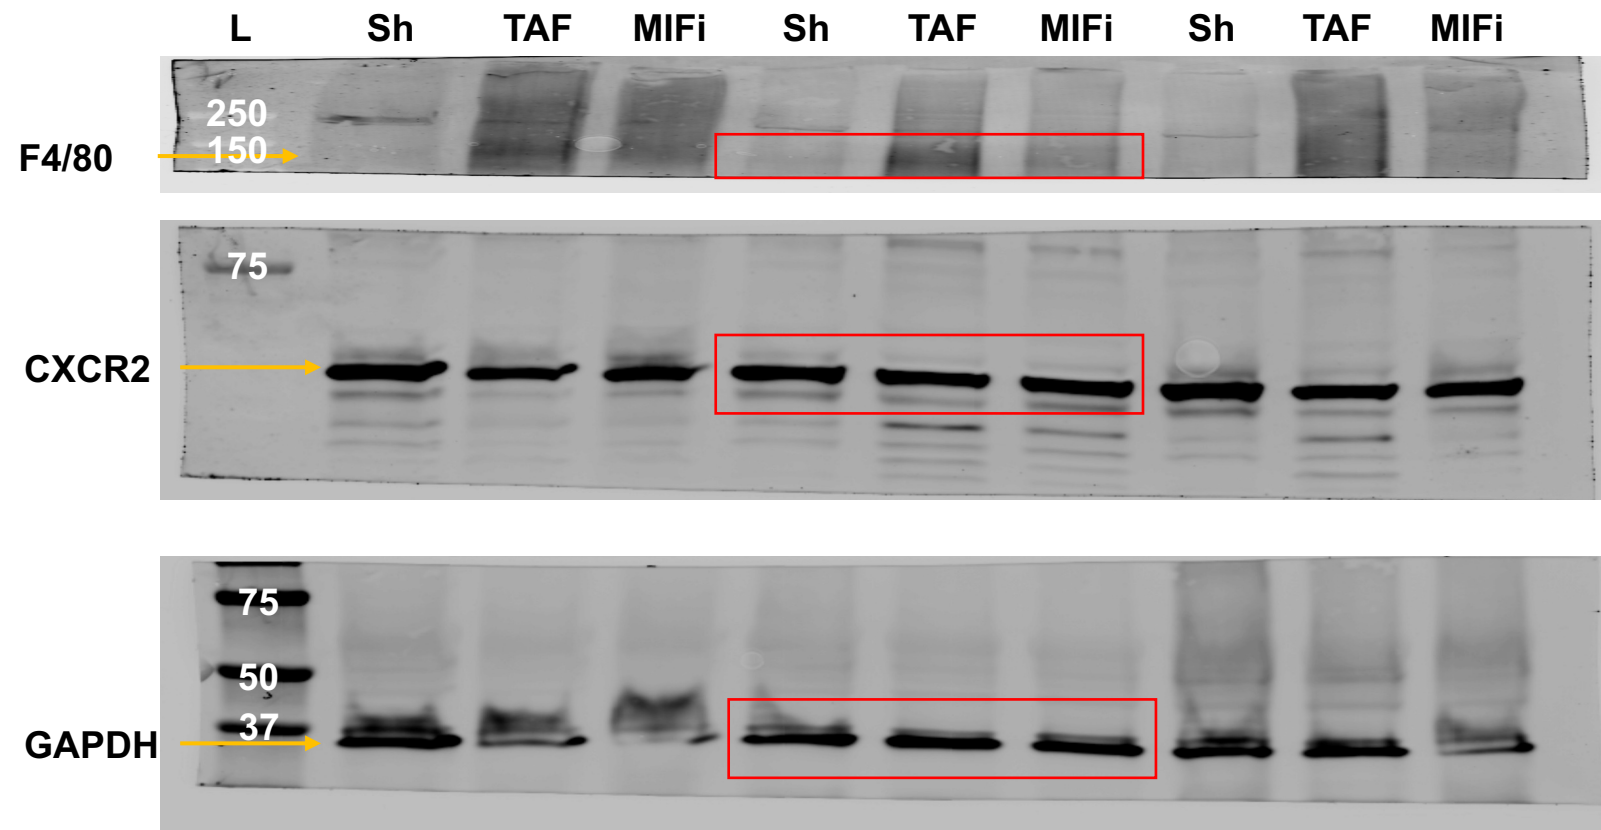

Full, unedited blots for Figure 1F – gel 2

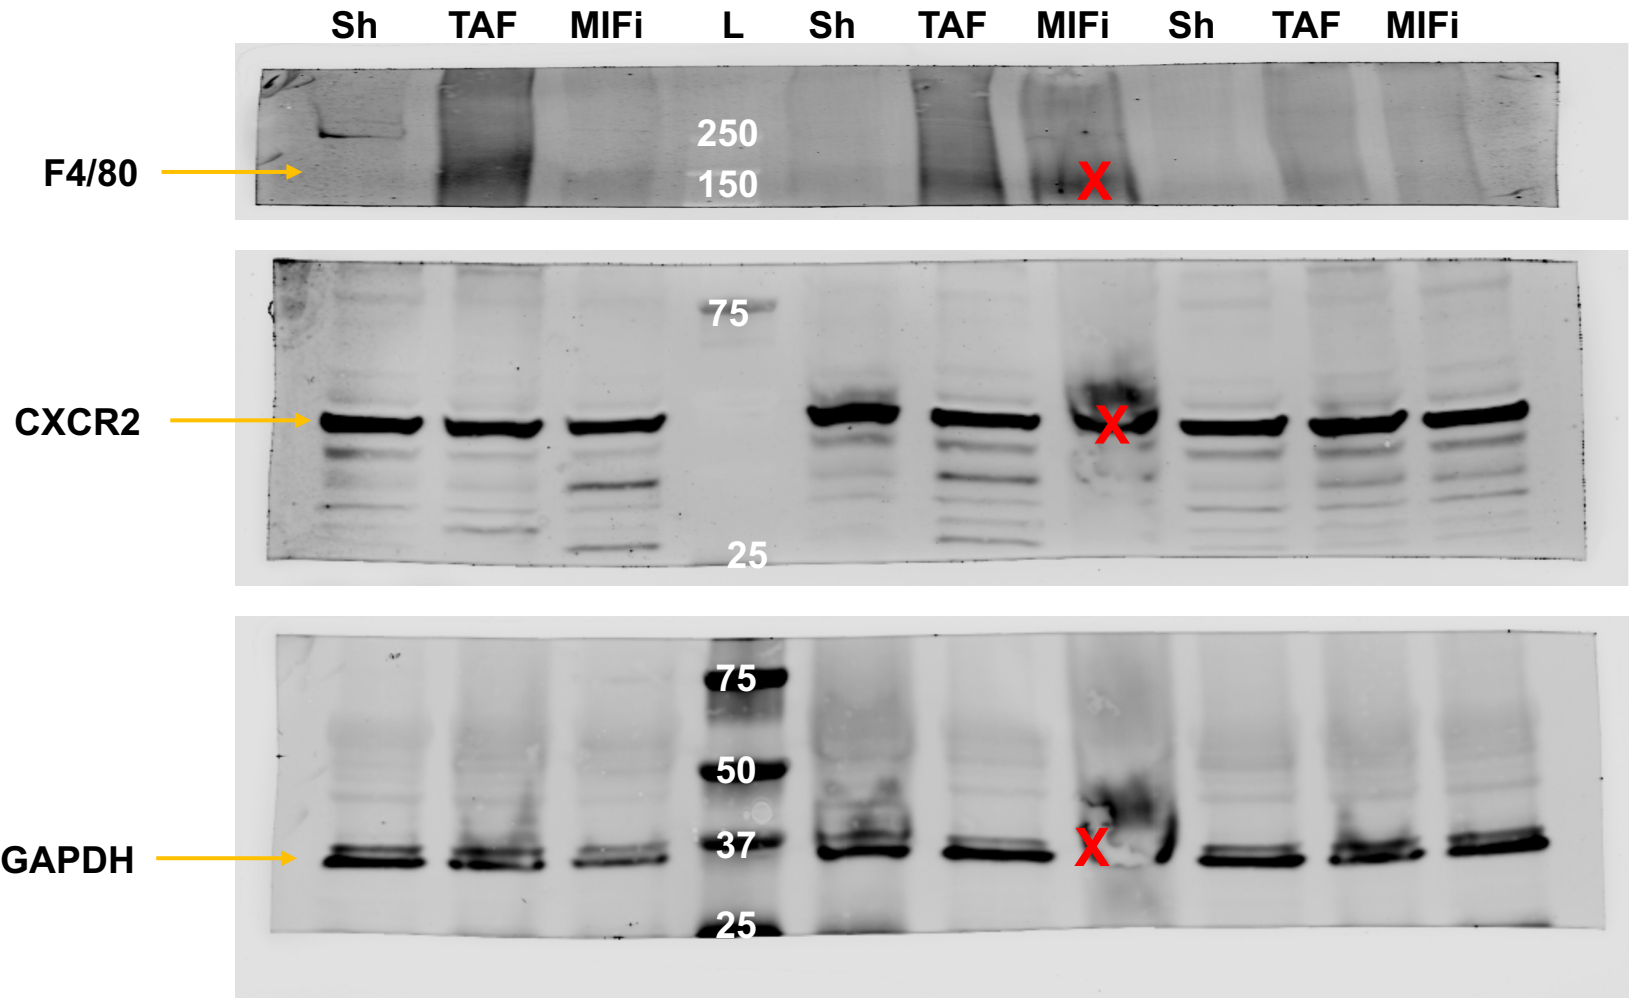

Full, unedited blots for Figure 1I – gel 1

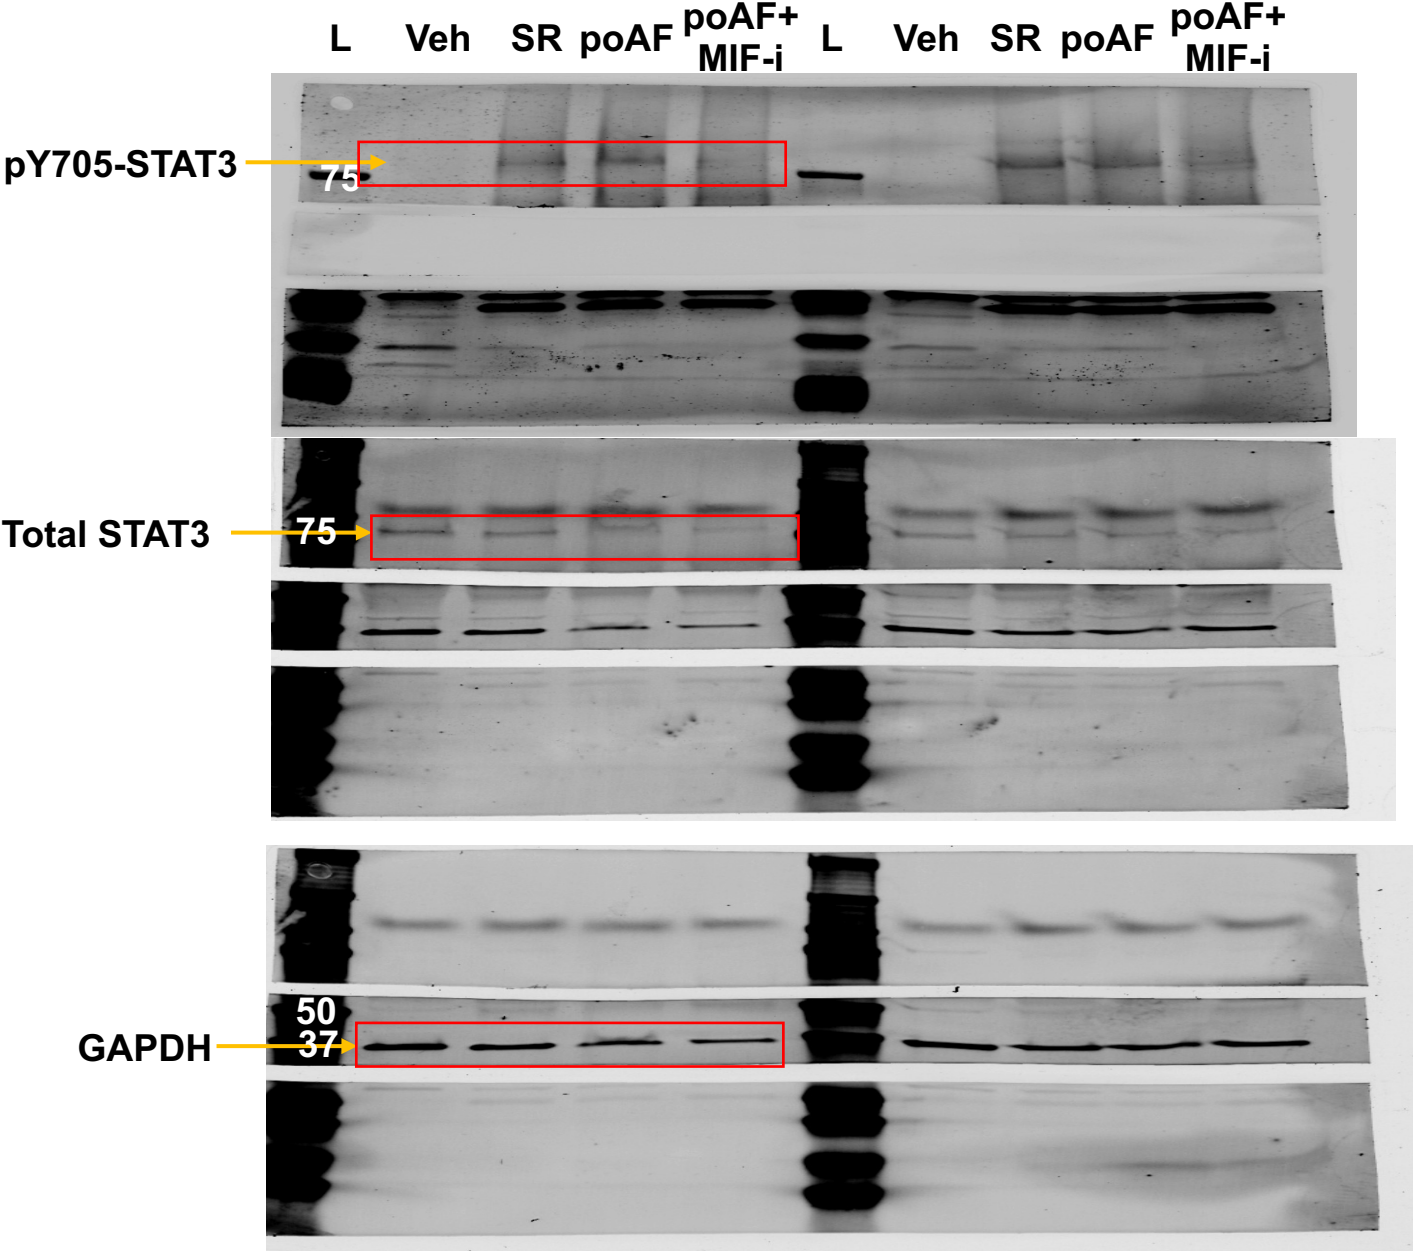

Full, unedited blots for Figure 1I – gel 2

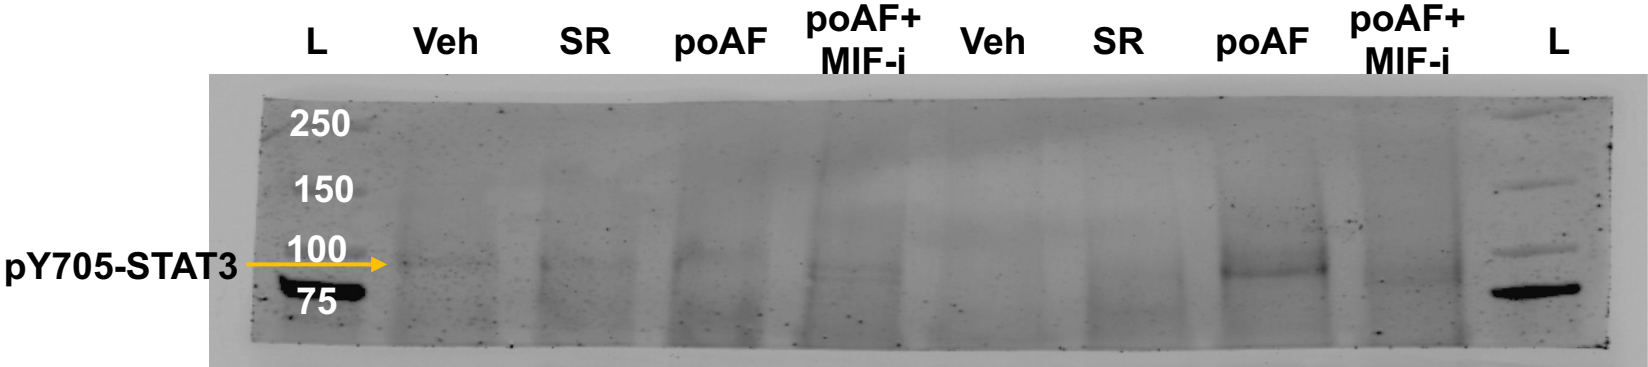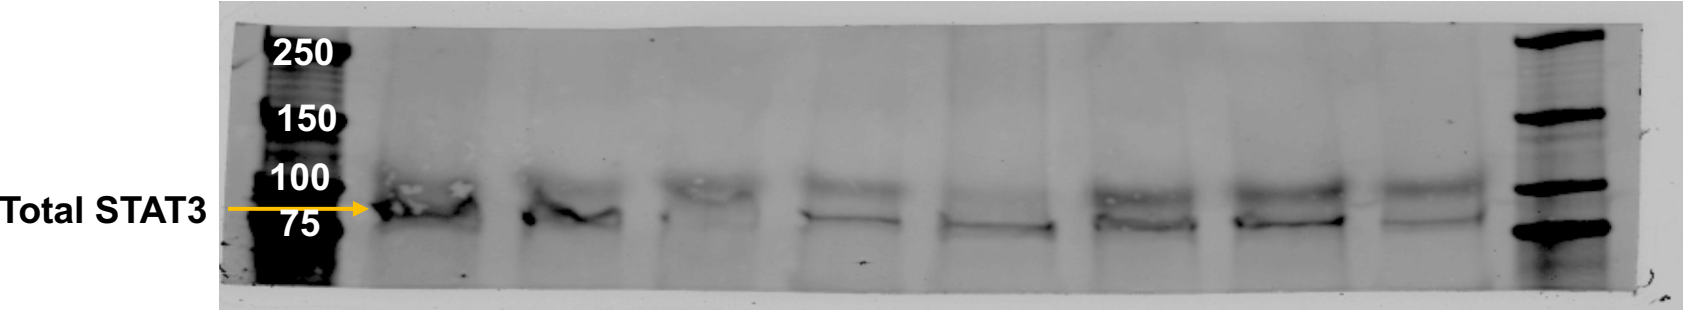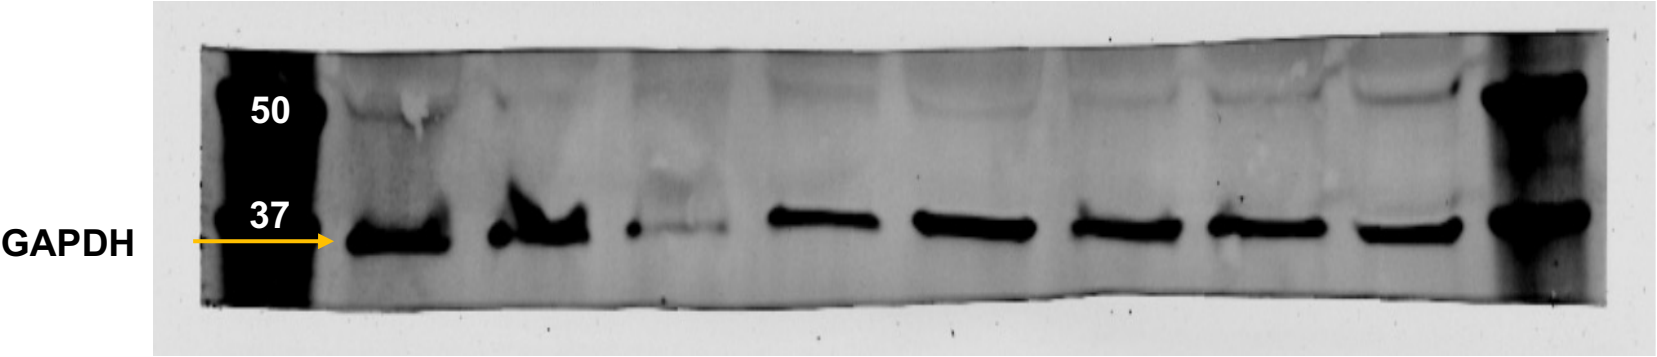

Supplement: sd2 [file 2]
